# Supplementary material for: Marine bacteroidetes use a conserved enzymatic cascade to digest diatom β-mannan
Source: PubMed Central journal article supplement (PMC9860051; doi:10.1038/s41396-022-01342-4), 2022-11-21
Supplement: 41396_2022_1342_MOESM1_ESM.pdf [file 41396_2022_1342_MOESM1_ESM.pdf]

## Supporting Information

### **Marine bacteroidetes use a conserved enzymatic cascade to digest diatom $\beta$ -mannan**

Irena Beidler<sup>1‡</sup>, Craig S Robb<sup>2,3‡</sup>, Silvia Vidal-Melgosa<sup>2,3</sup>, Marie-Katherin Zühlke<sup>1,4</sup>, Daniel Bartosik<sup>1,4</sup>, Vipul Solanki<sup>2,3</sup>, Stephanie Markert<sup>1,4</sup>, Dörte Becher<sup>5</sup>, Thomas Schweder<sup>1,4\*</sup>, Jan-Hendrik Hehemann<sup>2,3\*</sup>

<sup>1</sup> Pharmaceutical Biotechnology, Institute of Pharmacy, University Greifswald, 17489 Greifswald, Germany

<sup>2</sup> Max Planck Institute for Marine Microbiology, 28359 Bremen, Germany

<sup>3</sup> University of Bremen, Center for Marine Environmental Sciences, MARUM, 28359 Bremen, Germany

<sup>4</sup> Institute of Marine Biotechnology, 17489 Greifswald, Germany

<sup>5</sup> Institute of Microbiology, University Greifswald, 17489 Greifswald, Germany.

‡ Authors contributed equally to this work

\*Corresponding authors

Thomas Schweder, e-mail: schweder@uni-greifswald.de

Jan-Hendrik Hehemann, e-mail: jheheman@mpi-bremen.de

### **This Supporting Information file contains:**

Supplementary Methods with references

Supplementary Tables S1 - S2, S5

Supplementary Figure S1 – S5

Supplementary Tables S3 & S4 are available as separate Excel files

## Supplementary Methods

### *Protein extraction and subproteome enrichment*

Triplicates of 100 mL cultures were harvested via centrifugation (4 000 x g, 20 min). Cells were washed twice with TE buffer (10 mM Tris-HCl (pH 7.5), 10 mM EDTA (pH 8.0)) and resuspended in 50 mM Tris-HCl (pH 7.5) containing Roche 'cOmplete Protease Inhibitor (Lysis Buffer) (Roche, Basel, Switzerland). Cells were disrupted via sonication (3 x 30 s) (HD/UV 2070, Bandelin, Berlin, Germany) and cell debris was removed by centrifugation. Integral membrane and cytosolic proteins for subproteomes from glucomannan cultures were separated by ultracentrifugation at 100 000 x g and 4 °C for 65 min. The pelleted membrane was resuspended in TE buffer and thoroughly ground using a glass homogenizer.

For the extraction of the extracellular fraction, the culture supernatant was filtered using a 0.2 µm filter to remove remaining cells and then incubated with StrataClean beads at 4 °C and 150 rpm over night to bind cell-detached protein [1]. The mixture was centrifuged at 10 000 x g and 4 °C and washed once with TE buffer. Remaining buffer was evaporated using a SpeedVac (Concentrator Plus, Eppendorf, Hamburg, Germany).

Protein concentration of all samples except the extracellular fraction was determined using the Pierce™ BCA Protein Assay Kit (ThermoFischer Scientific, Waltham, MA, USA). 25 µg of protein were loaded on a 10% 1D-SDS polyacrylamide gel and separated for 90 min at 120 V. After fixing with 40% ethanol/10% acetic acid followed by Coomassie G-250 staining [2], the proteins were in-gel digested overnight (16 h) using trypsin [3].

### *Microarray analysis*

The printed arrays were first blocked for 1 h with phosphate-buffered saline (PBS) containing 5% (w/v) low fat milk powder (MPBS). The MPBS was washed three times with PBS. Then single arrays were individually incubated with either: recombinant GH26C or GH5\_26 at 5 µg/mL, or 100 mM sodium phosphate buffer pH 7.0, or β-mannanase (E-BMACJ), cellulase

(E-CELTR) or  $\beta$ -galactanase (E-GALCJ) from Megazyme at 1 U/mL, at 37 °C and 100 rpm overnight. After the treatment, arrays were extensively washed with PBS followed by 2 h incubation with the primary monoclonal antibodies (mAbs) LM21 (PlantProbes, UK) and BS-400-3 (BioSupplies, Australia) diluted 1/10 and 1/1000 in MPBS, correspondingly. After a washing step with PBS, arrays were incubated for 2 h with the anti-rat or anti-mouse secondary antibodies conjugated to alkaline phosphatase (A8438 and A3562, Sigma-Aldrich) both diluted 1/5000 in MPBS. After washing with PBS and MilliQ, arrays were developed with alkaline phosphatase substrate. The developed arrays were analyzed as described previously [4]. The highest mean signal intensity value obtained in the whole data set was set to 100 and all other values were normalized accordingly. A cut-off of 4 arbitrary units was applied. Controls for the extraction solvents and for the secondary antibodies showed no unspecific binding of the probes.

**Table S1. Information on diatom species used for the search of marine  $\beta$ -mannan sources**

| <b>Diatom species</b>                    | <b>Strain information</b>                             |
|------------------------------------------|-------------------------------------------------------|
| <i>Chaetoceros affinis</i>               | CCMP158 (NCMA, Bigelow Laboratory)                    |
| <i>Coscinodiscus wailesii</i> (strain 1) | CCMP2513 (NCMA, Bigelow Laboratory)                   |
| <i>Coscinodiscus wailesii</i> (strain 2) | Isolated at Helgoland (54°11.3'N,7°54.0'E), North Sea |
| <i>Nitzschia frustulum</i>               | CCMP558 (NCMA, Bigelow Laboratory)                    |
| <i>Phaeodactylum tricornutum</i>         | CCMP2561 (NCMA, Bigelow Laboratory)                   |
| <i>Thalassiosira pseudonana</i>          | provided by André Scheffel (Potsdam, Germany)         |
| <i>Thalassiosira weissflogii</i>         | provided by André Scheffel (Potsdam, Germany)         |



**Table S5. X-ray data collection, processing and model refinement statistics for M\_GH26C and M\_GH26A**

| <b>Dataset</b>                           | <b>GH26A</b>                                       | <b>GH26C</b>                               |
|------------------------------------------|----------------------------------------------------|--------------------------------------------|
| Resolution (Å)                           | 45.12-1.75 (1.84-1.75)                             | 49.40-1.50 (1.52-1.50)                     |
| Space group                              | P1                                                 | C121                                       |
| Unit Cell (Å) (°)                        | 47.524, 49.342, 71.711<br>(77.999, 89.831, 69.641) | 94.119, 60.358, 148.99<br>(90, 95.925, 90) |
| No. of Reflections                       | 248361 (36556)                                     | 884001 (39440)                             |
| No. Unique                               | 58106 (8362)                                       | 132761 (6137)                              |
| R <sub>sym</sub> (%)                     | 0.089 (0.482)                                      | 0.117 (0.945)                              |
| Completeness (%)                         | 9.2 (2.7)                                          | 9.5 (2.2)                                  |
| Redundancy                               | 96.7 (95.2)                                        | 99.5 (93.6)                                |
| <I/σ(I)>                                 | 4.3 (4.4)                                          | 6.7 (6.4)                                  |
| Mosaicity                                | 0.13                                               | 0.06                                       |
| <i>Refinement</i>                        |                                                    |                                            |
| R <sub>work</sub> /R <sub>free</sub> (%) | 15/19                                              | 16/19                                      |
| Number of Atoms                          | 5418                                               | 6747                                       |
| Protein                                  | 4970                                               | 6189                                       |
| Ligand (TRS; GOL)                        | 20                                                 | 18.3                                       |
| Water                                    | 428                                                | 842                                        |
| <i>B</i> factors                         |                                                    |                                            |
| Overall                                  | 26.09                                              | 18.3                                       |
| Protein                                  | 25.12                                              | 16.49                                      |
| Ligand (TRS; GOL)                        | 32.04                                              | 18.68                                      |
| Water                                    | 37.01                                              | 31.23                                      |
| RMSZ                                     |                                                    |                                            |
| Bond Lengths                             | 0.009                                              | 0.011                                      |
| Bond Angles                              | 0.95                                               | 1.1                                        |
| Ramachandran Statistics (%)              |                                                    |                                            |
| Favored                                  | 96.4                                               | 97.33                                      |
| Allowed                                  | 3.56                                               | 2.4                                        |
| Outliers                                 | 0                                                  | 0.27                                       |
|                                          |                                                    |                                            |
| PDB accession code                       | 6Q75                                               | 6Q78                                       |

## Supplementary Figures

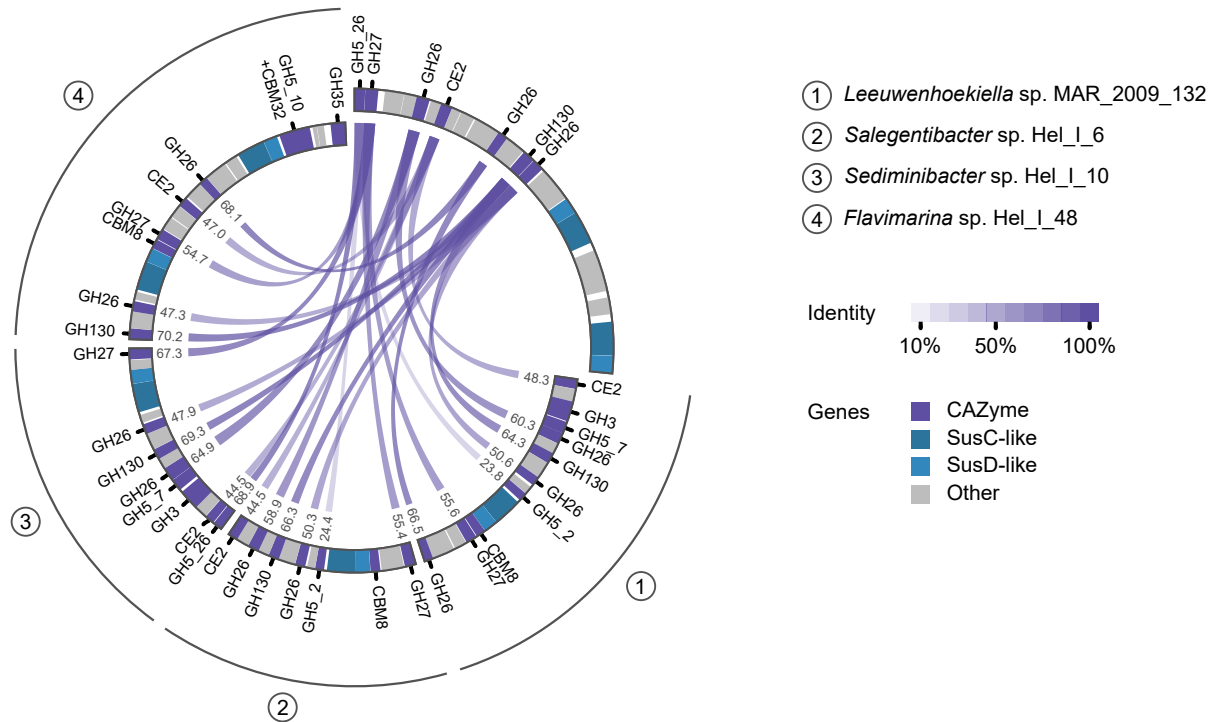

**Figure S1. CAZyme synteny of the *Muricauda* sp. MAR\_2010\_75  $\beta$ -mannan PUL with those of other bloom-associated strains. Only the highest scoring hit for each CAZyme in a PUL is shown. Ribbon color intensity indicates degree of similarity; cutoff  $10^{-5}$ . Identities (%) are given for each link.**

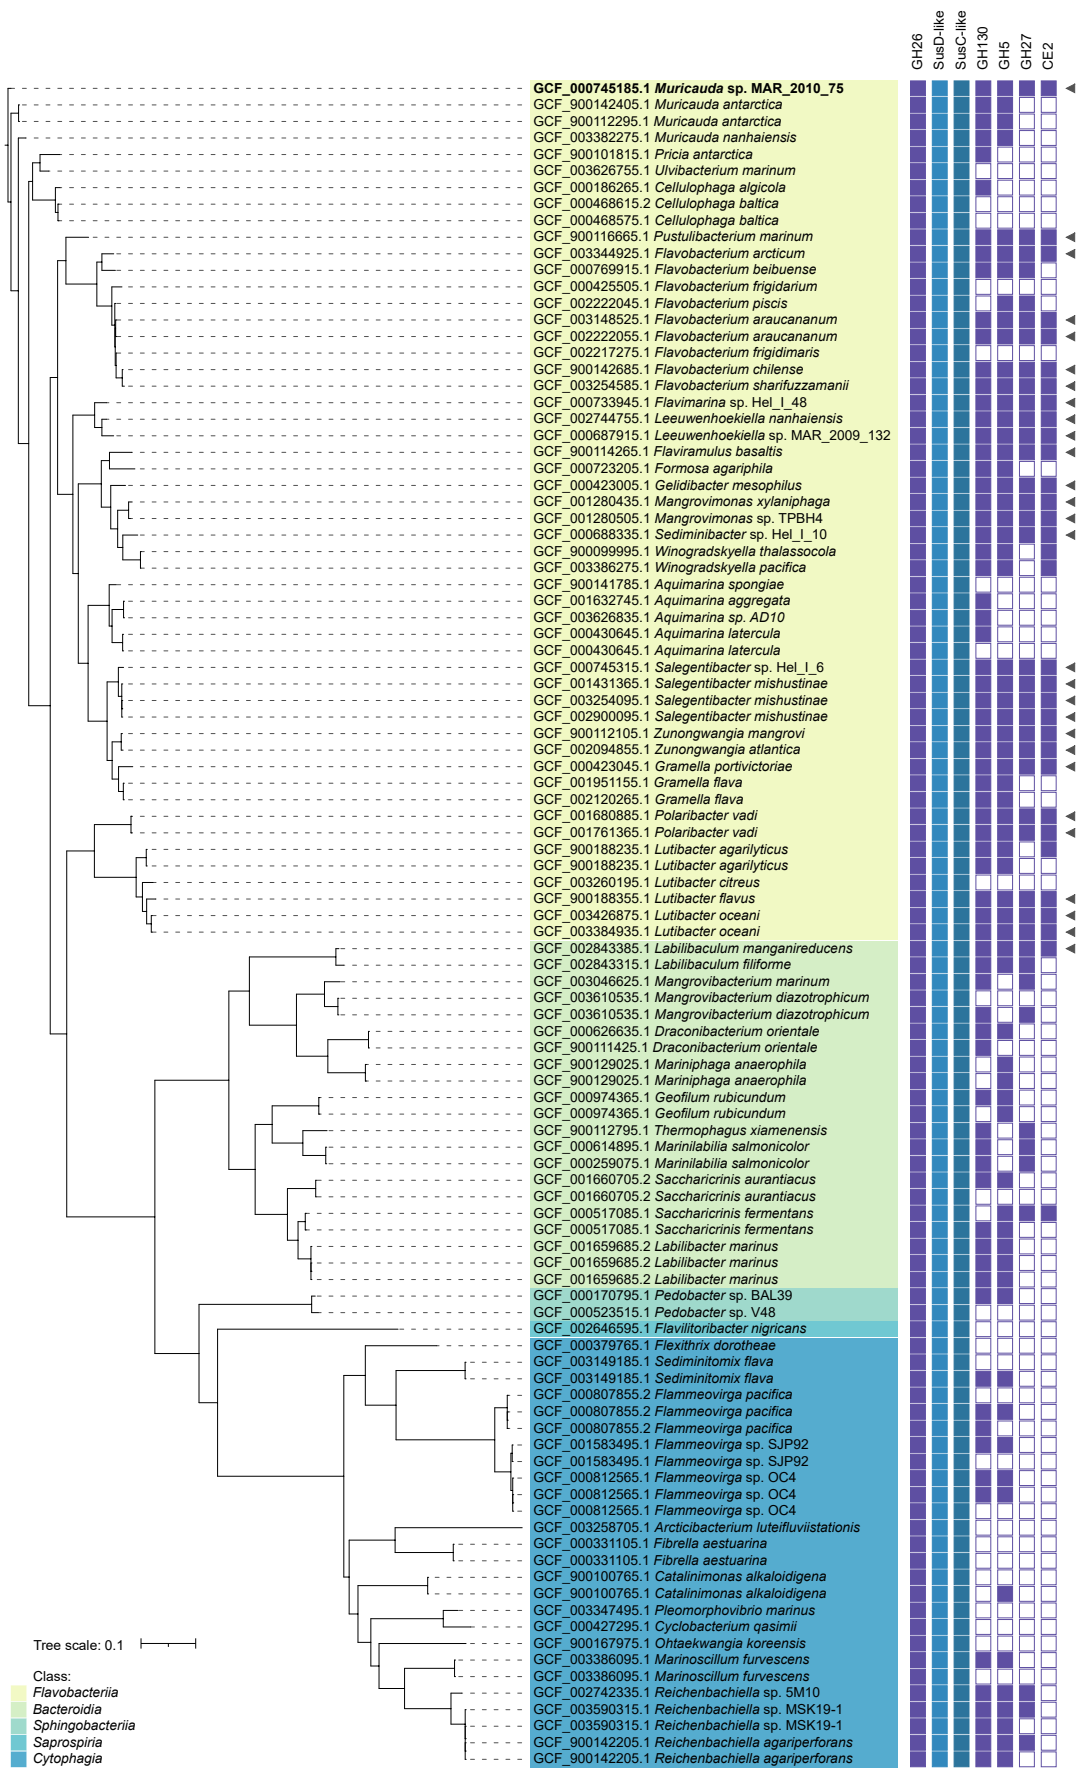

**Figure S2. Maximum likelihood phylogeny of all clusters similar to the *Muricauda* sp. MAR\_2010\_75 PUL found in marine databases.** Class of the bacteria encoding for the found clusters is given in color. The modularity of each cluster as it compares to the *Muricauda* sp. PUL is shown on the right.

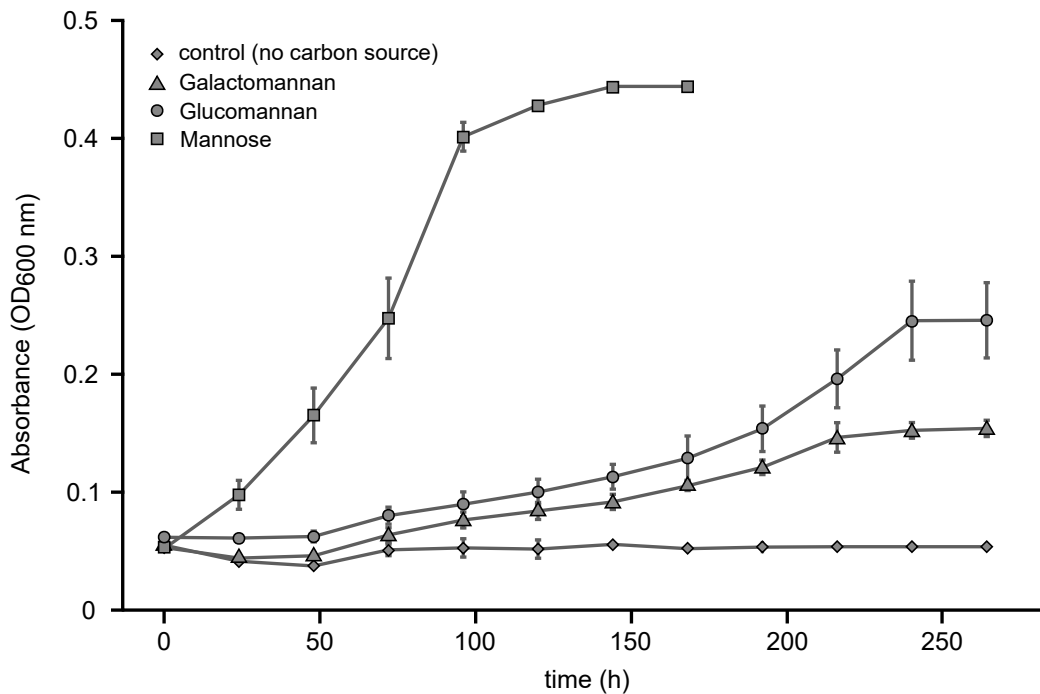

**Figure S3. *Muricauda* sp. MAR\_2010\_75 is able to use multiple mannose-containing substrates as sole carbon source.** The strain was grown in MPM-medium with 0.2% (w/v) specific poly- or monosaccharides until no significant changes in optical density could be detected over the course of 24 h after exponential growth (time points omitted). Values shown depict the mean of three replicates with standard deviation.



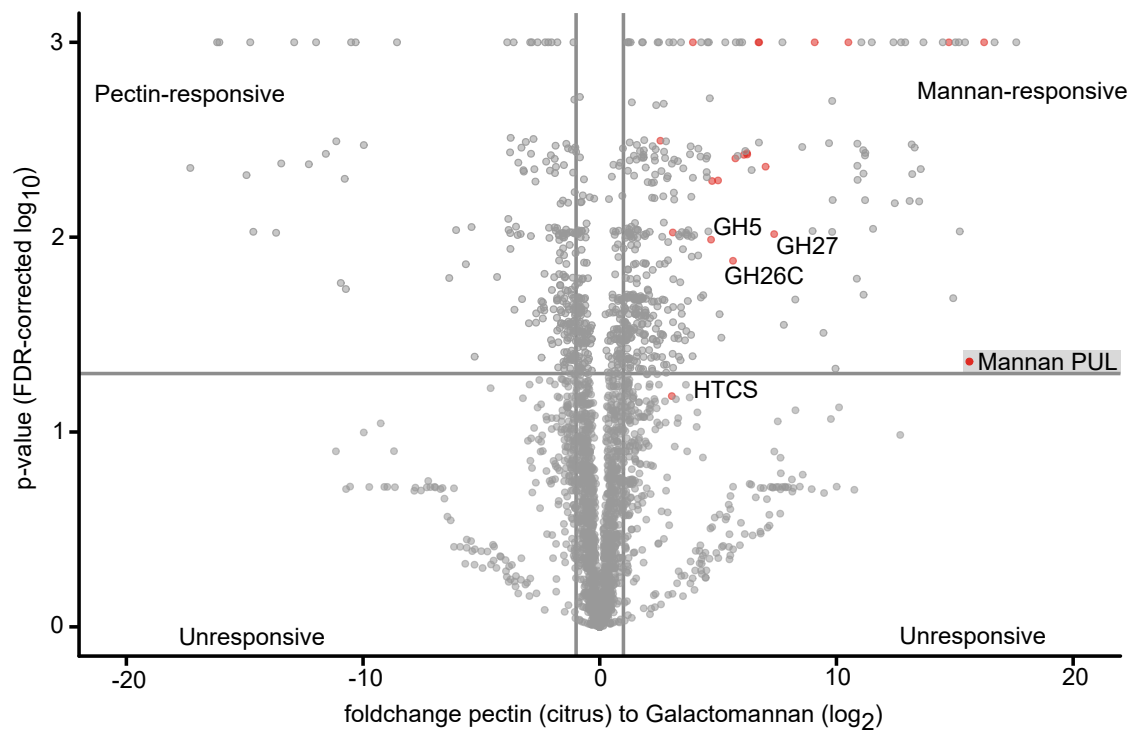

**Figure S4. Growth on  $\beta$ -mannan-containing substrates specifically induces proteins of the *Muricauda* sp. MAR\_2010\_75 mannan-PUL in a statistically significant manner.** Fold changes and p-values were calculated from MS-measurements of three biological replicates per substrate using the Perseus statistical software [5]. Proteins not detected in one condition were given an artificial value 1.25 times lower than the lowest detected value in the sample to show their significance. Proteins belonging to the  $\beta$ -mannan PUL are shown in red.

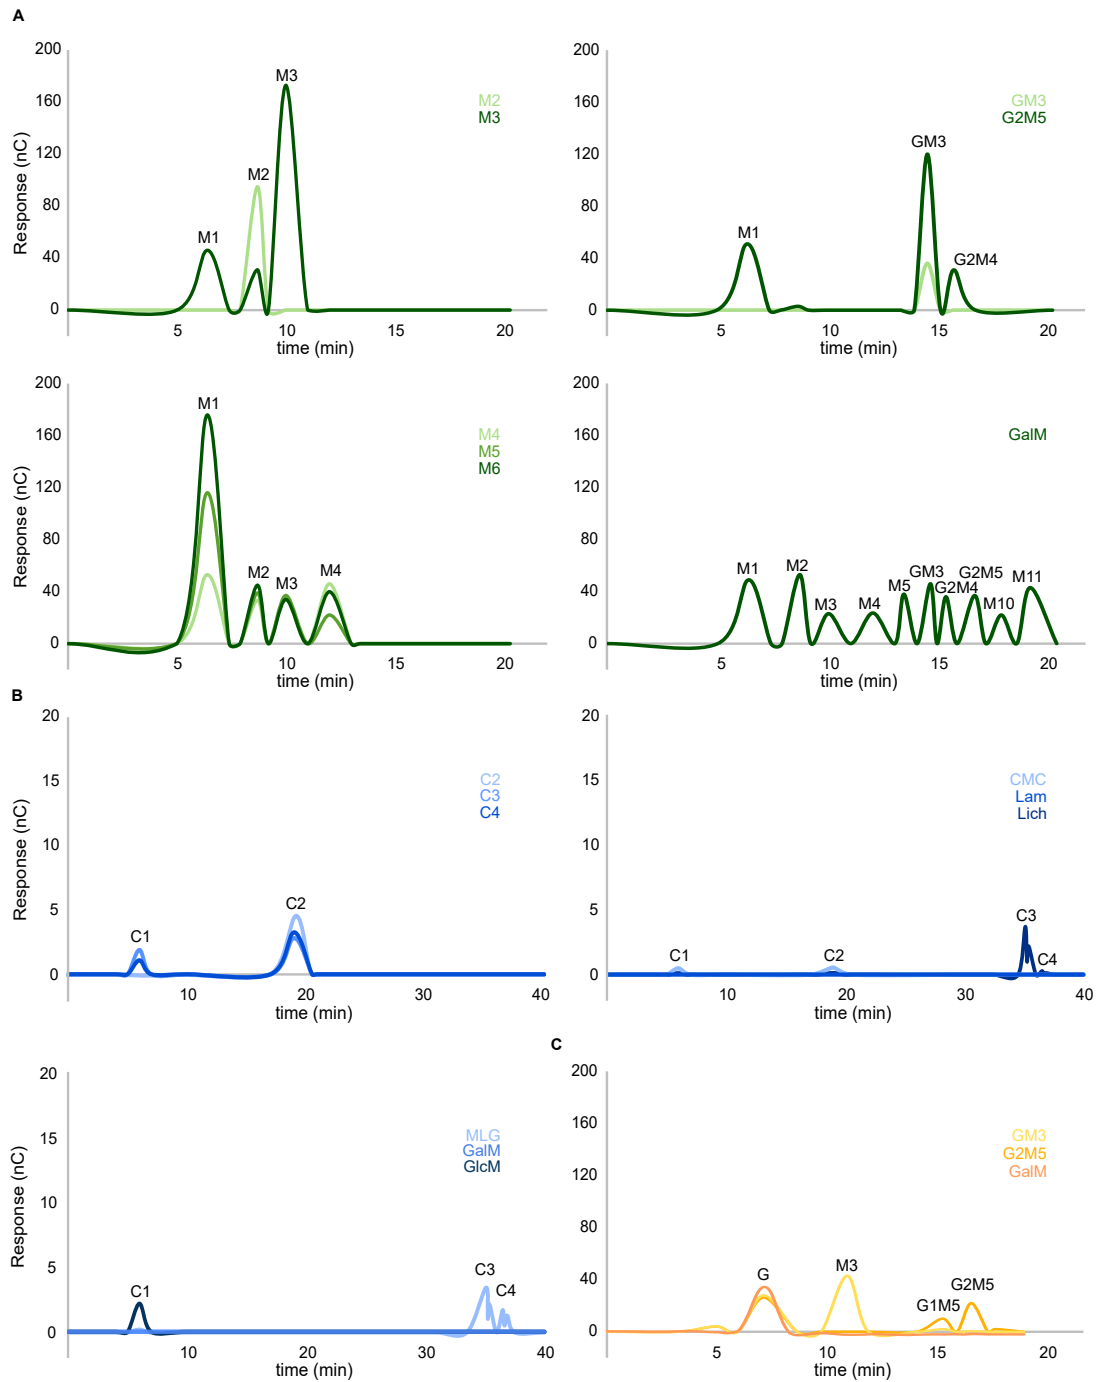

**Figure S5. HPAEC-PAD data of recombinantly produced enzymes with different poly- and oligosaccharides.** Enzymes GH26C (A), GH5\_26 (B) and GH27 (C) were incubated with the respective substrate (in color) for 2 h. Samples were heat inactivated and then measured diluted 1:1000. Observed peaks were compared to mono- and oligosaccharide standards (black). M manno-, C cellu-, G galactomono or -oligosaccharides with dp given as the number behind them.

## References

1. Bonn F, Otto A (2018) Protein Enrichment from Highly Dilute Samples with StrataClean. *Methods Mol Biol* 1841:11–18. [https://doi.org/10.1007/978-1-4939-8695-8\\_2](https://doi.org/10.1007/978-1-4939-8695-8_2)
2. Candiano G, Bruschi M, Musante L et al. (2004) Blue silver: a very sensitive colloidal Coomassie G-250 staining for proteome analysis. *Electrophoresis* 25:1327–1333. <https://doi.org/10.1002/elps.200305844>
3. Grube M, Cernava T, Soh J et al. (2015) Exploring functional contexts of symbiotic sustain within lichen-associated bacteria by comparative omics. *ISME J* 9:412–424. <https://doi.org/10.1038/ismej.2014.138>
4. Vidal-Melgosa S, Sichert A, Francis TB et al. (2021) Diatom fucan polysaccharide precipitates carbon during algal blooms. *Nat Commun* 12:1150. <https://doi.org/10.1038/s41467-021-21009-6>
5. Tyanova S, Temu T, Sinitcyn P et al. (2016) The Perseus computational platform for comprehensive analysis of (prote)omics data. *Nature Methods* 13:731–740. <https://doi.org/10.1038/nmeth.3901>
6. Yu C-S, Lin C-J, Hwang J-K (2004) Predicting subcellular localization of proteins for Gram-negative bacteria by support vector machines based on n-peptide compositions. *Protein Sci* 13:1402–1406. <https://doi.org/10.1110/ps.03479604>
7. Yu NY, Wagner JR, Laird MR et al. (2010) PSORTb 3.0: improved protein subcellular localization prediction with refined localization subcategories and predictive capabilities for all prokaryotes. *Bioinformatics* 26:1608–1615. <https://doi.org/10.1093/bioinformatics/btq249>
